# Supplementary material
Source: publisher site journal article supplement (https://www.dovepress.com/article/368682)
Supplement: Supplementary file 1 [file get_supplementary_file.php]

**Supplementary material**

**Table S1 List primers for amplification of WHO recommended DRDRs genes**

| Gene name | Primer sequence | Product length(bp) |
| --- | --- | --- |
| *fol*P1 F-out | CAATTCGTTCTCAGATGGCGG | 343 |
| *fol*P1 R-out | CATCAACACCCACGCAACAC |
| *fol*P1 F-in | CTTGATCCTGACGATGCTGT | 254 |
| *fol*P1 R-in | CCACCAGACACATCGTTGAC |
| *gyr*A F-out | GCGCAGCTATATTGATTACGCG | 387 |
| *gyr*A R-out | GCTCCAGTAACGATATCACC |
| *gyr*A F-in | AAGTCCGCGATGGTCTCAAA | 263 |
| *gyr*A R-in | ACAATAACGCATCGCTGCC |
| *rpo*B F-out | AGCGGATGACCACCCAGGA | 406 |
| *rpo*B R-out | TCTTCCTCGTCAGCGGTCAA |
| *rpo*B F-in | GTCGAGGCGATCACGCCGCA | 279 |
| *rpo*B R-in | CGACAATGAACCGATCAGAC |

**Table S2 List primers used for amplification of extended DRDRs genes**

| Gene name | Primer sequence | Product length(bp) |
| --- | --- | --- |
| nth F-out | AGTCTGAATAGGGCGTATCACG | 671 |
| nth R-out | CTCACTTGCCTTATCGCTAC |
| nth F-in | ATCAAACTCCGTGATAGCTGG | 406 |
| nth R-in | ACCCACATCCACCCTAGAA |
| *rpo*A F-out | TCAAATAGTGGGTGCCGAGAA | 1044 |
| *rpo*A R-out | TTGGGCATTGCTGACACTCC |
| *rpo*A F-in | ACAGACCCAGTTGGTGCAGTT | 286 |
| *rpo*A R-in | GGTAAGACGCTGGTCGAGTTGT |
| *rpo*C F-out | ACTGAAGTCGCTGTCTGATC | 1052 |
| *rpo*C R-out | AGTGGTCGAGGATCTCCTT |
| *rpo*C F-in | ACCTGCTTGGTAAGCGTGTT | 920 |
| *rpo*C R-in | GTAGAAACCGGCGTCCTTGA |
| 23S rRNA F-out | ATATCGTGAACACCCTTGCG | 986 |
| 23S rRNA R-out | ACTGGTATACCAGAGGTTCG |
| 23S rRNA F-in | TAAAAACACAGGTCCGTGCG | 844 |
| 23S rRNA R-in | CGGCGGATAGAGACCGAA |

**Table S3 Clinical and other relative information of all cases from four provinces.**

| **No** | **Gender** | **Age** | **Ethnicity** | **Locality** | **BI** | **Date of diagnosis** | **Delay month** | **<=24 months** | **Nerve involvement** | **Deformity** | **AFB** | **RJ classification** | **WHO** | **Treatment** | **Reaction** |
| --- | --- | --- | --- | --- | --- | --- | --- | --- | --- | --- | --- | --- | --- | --- | --- |
| 1 | Female | 28 | Han | Local resident | 3 | 2018/11/26 | 7 | 1 | Yes | Yes | Positive | BL | MB | MDT-MB | Yes |
| 2 | Male | 46 | Han | Local resident | 0 | 2018/5/8 | 37 | 0 | No | No | Negative | TT | PB | MDT-PB | No |
| 3 | Male | 28 | Han | Floating population | 4 | 2018/5/27 | 20 | 1 | Yes | Yes | Positive | LL | MB | MDT-MB | No |
| 4 | Male | 31 | Han | Floating population | 5.4 | 2018/3/24 | 13 | 1 | Yes | No | Positive | LL | MB | MDT-MB | No |
| 5 | Male | 50 | Han | Floating population | 4 | 2018/2/15 | 24 | 1 | Yes | No | Positive | BL | MB | MDT-MB | No |
| 6 | Male | 22 | Han | Floating population | 0 | 2018/1/18 | 15 | 1 | No | Yes | Negative | BT | MB | MDT-MB | No |
| 7 | Female | 44 | Ethnic minority | Floating population | 4 | 2018/4/23 | 2 | 1 | No | No | Positive | LL | MB | MDT-MB | No |
| 8 | Male | 29 | Han | Floating population | 3.3 | 2018/4/18 | 14 | 1 | Yes | Yes | Positive | BL | MB | MDT-MB | No |
| 9 | Female | 60 | Ethnic minority | Local resident | 2.2 | 2019/5/7 | 57 | 0 | Yes | Yes | Positive | BL | MB | MDT-MB | No |
| 10 | Male | 22 | Ethnic minority | Floating population | 0 | 2019/7/8 | 1 | 1 | No | No | Negative | BT | PB | MDT-PB | No |
| 11 | Male | 25 | Ethnic minority | Floating population | 3.8 | 2019/8/8 | 7 | 1 | No | No | Positive | LL | MB | MDT-MB | No |
| 12 | Male | 45 | Han | Floating population | 2 | 2019/12/11 | 11 | 1 | No | No | Positive | BL | MB | MDT-MB | No |
| 13 | Male | 24 | Han | Floating population | 4.3 | 2019/12/18 | 11 | 1 | Yes | No | Positive | BL | MB | MDT-MB | No |
| 14 | Male | 17 | Han | Floating population | 3.4 | 2019/12/18 | 9 | 1 | Yes | No | Positive | BL | MB | MDT-MB | No |
| 15 | Female | 26 | Han | Floating population | 0 | 2019/12/19 | 4 | 1 | No | No | Negative | I | PB | MDT-PB | No |
| 16 | Male | 24 | Han | Floating population | 5.2 | 2019/6/11 | 10 | 1 | No | No | Positive | LL | MB | MDT-MB | Yes |
| 17 | Female | 29 | Han | Floating population | 1.5 | 2020/5/26 | 6 | 1 | Yes | Yes | Positive | BB | MB | MDT-MB | Yes |
| 18 | Male | 45 | Han | Floating population | 0 | 2020/5/25 | 6 | 1 | Yes | No | Negative | BT | MB | MDT-MB | No |
| 19 | Female | 66 | Han | Local resident | 4.2 | 2020/5/24 | 5 | 1 | Yes | Yes | Positive | LL | MB | MDT-MB | No |
| 20 | Male | 53 | Han | Floating population | 1.2 | 2020/6/17 | 12 | 1 | Yes | Yes | Positive | LL | MB | MDT-MB | No |
| 21 | Male | 22 | Han | Floating population | 0 | 2020/7/27 | 24 | 1 | Yes | No | Negative | TT | PB | MDT-PB | No |
| 22 | Male | 39 | Han | Floating population | 0 | 2020/8/6 | 12 | 1 | Yes | Yes | Negative | BT | MB | MDT-MB | No |
| 23 | Female | 67 | Han | Local resident | 0 | 2020/9/29 | 156 | 0 | No | Yes | Negative | I | / | / | No |
| 24 | Male | 72 | Han | Local resident | 5.5 | 2020/9/29 | 84 | 0 | No | No | Positive | LL | MB | MDT-MB | No |
| 25 | Male | 48 | Han | Floating population | 2.5 | 2020/12/11 | 6 | 1 | No | Yes | Positive | LL | MB | MDT-MB | No |
| 26 | Male | 19 | Han | Floating population | 4.3 | 2021/4/6 | 12 | 1 | Yes | Yes | Positive | LL | MB | MDT-MB | Yes |
| 27 | Male | 83 | Han | Local resident | 0.2 | 2021/5/7 | 2 | 1 | Yes | No | Positive | BB | MB | MDT-MB | No |
| 28 | Female | 66 | Han | Local resident | 4 | 2021/4/24 | 19 | 1 | No | No | Positive | LL | MB | MDT-MB | No |
| 29 | Female | 37 | Han | Floating population | 2.8 | 2021/6/29 | 24 | 1 | No | Yes | Positive | BL | MB | MDT-MB | No |
| 30 | Female | 51 | Han | Floating population | 2.8 | 2021/6/22 | 12 | 1 | Yes | Yes | Positive | BL | MB | MDT-MB | No |
| 31 | Male | 31 | Han | Floating population | 2 | 2021/7/20 | 11 | 1 | No | No | Positive | BL | MB | MDT-MB | No |
| 32 | Male | 39 | Han | Floating population | 3.5 | 2021/8/3 | 6 | 1 | No | No | Positive | BL | MB | MDT-MB | No |
| 33 | Male | 41 | Han | Floating population | 3.5 | 2021/8/17 | 12 | 1 | No | No | Positive | BL | MB | MDT-MB | No |
| 34 | Female | 37 | Han | Floating population | 3.3 | 2021/9/6 | 42 | 0 | No | No | Positive | BL | MB | MDT-MB | Yes |

**Note：/：**The patient recovered without treatment;

**Table S4 NCBI sequence ID and codon numbers of DRDRs-associated genes**

| Gene | Accession number of M.leprae TN | Condon number of mutations in this study |
| --- | --- | --- |
| *fol*P1 | AL583917.1 | 55(CCC-CTC) |
| *gyr*A | AL583917.1 | 91(GCA-GTA) |
| *rpo*B | AL583923.1 | / |
| *gyr*B | AL583917.1 | 215(AAG-AAC) |
| 368(CCA-CTA) |
| *rpo*A | AL583923.1 | / |
| *rpo*C | AL583923.1 | 879(GTG-ATG) |
| nth | AL583920.1 | / |
| 23S rRNA | AL583920.1 | / |


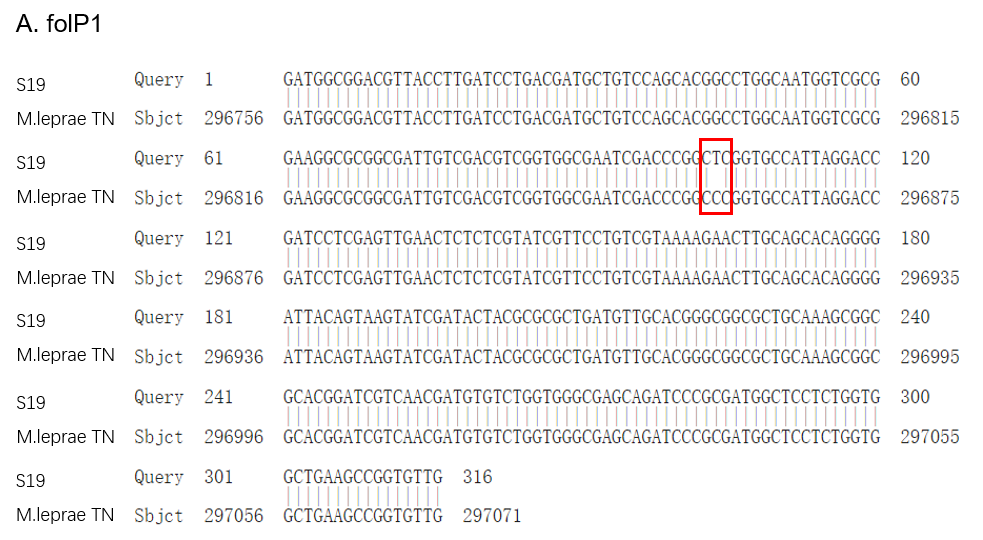


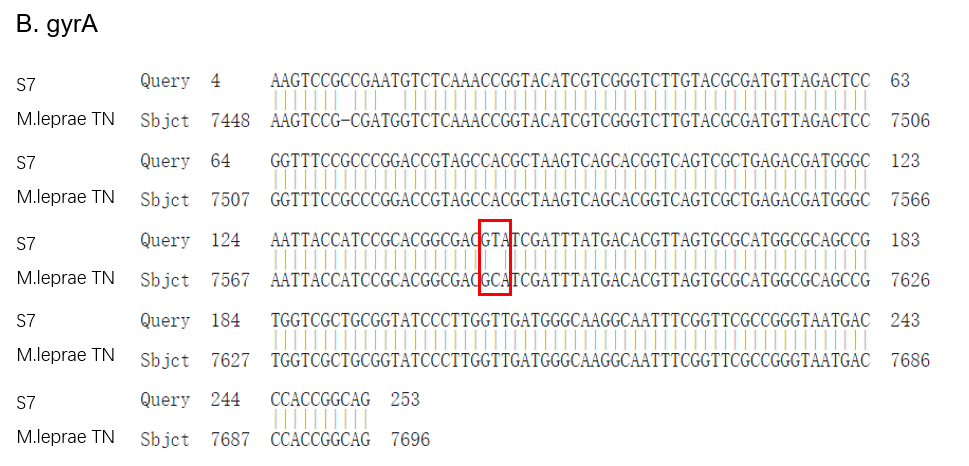


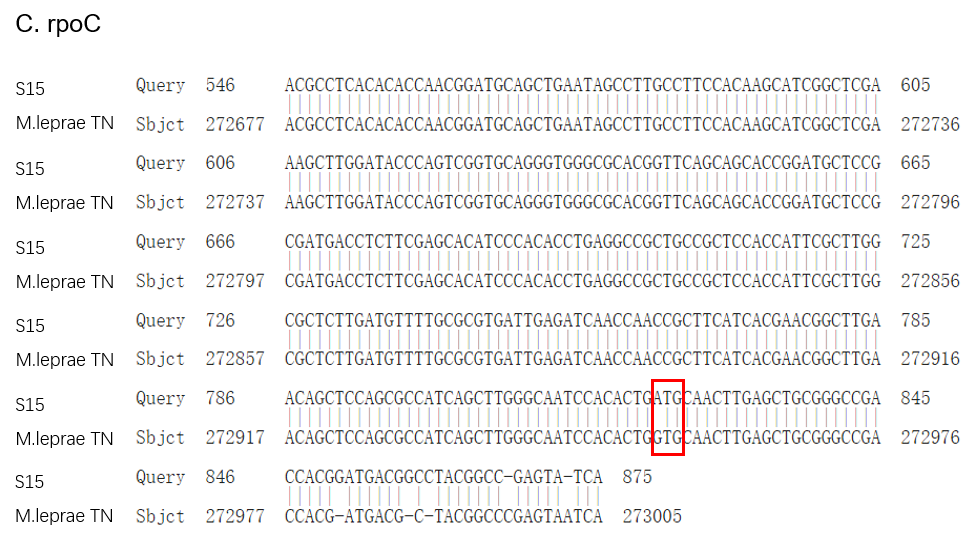


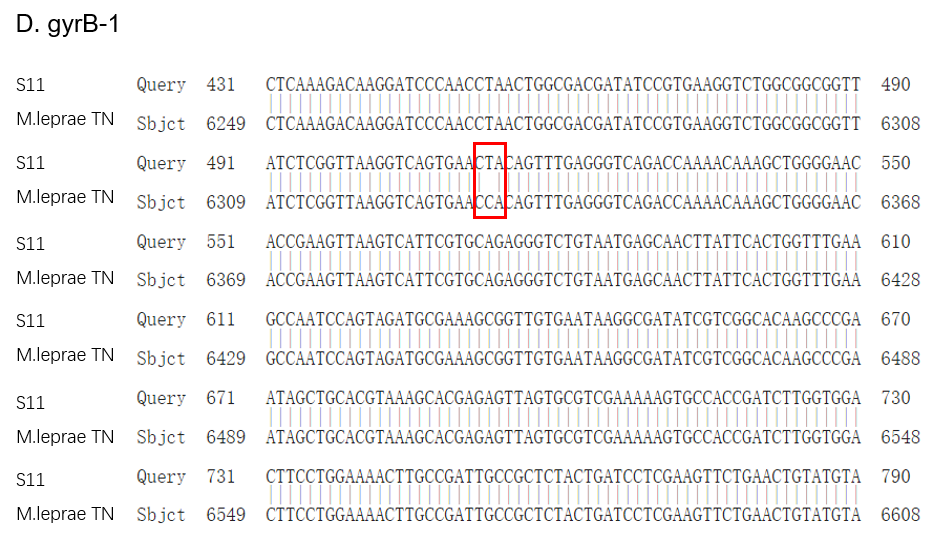


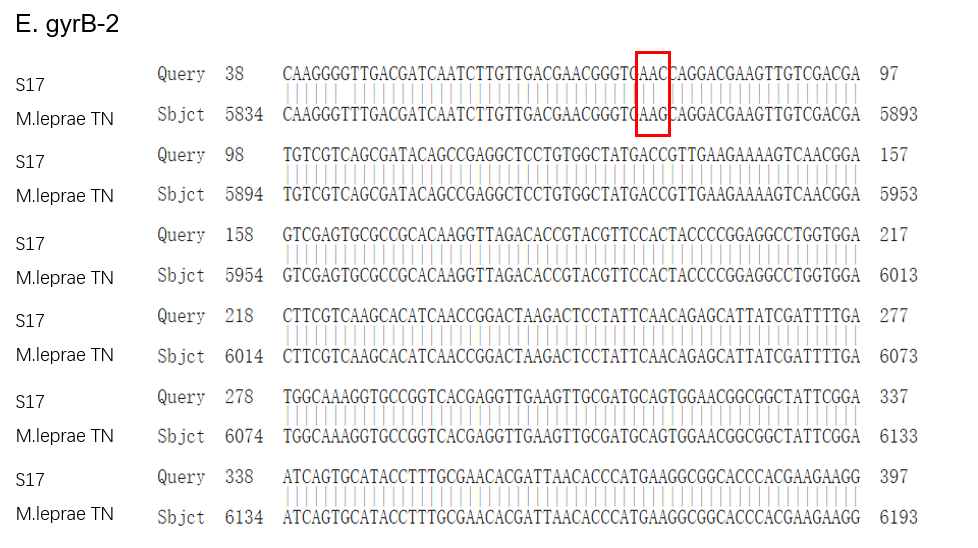
 **Figure S1** Alignments of mutated gene sequences with M. leprae TN strains by NCBI-BLAST

**Notes:** (A) Alignment of the mutated *fol*P1 gene sequence. (B) Alignment of the mutated *gyr*A gene sequence. (C) Alignment of the mutated *rpo*C gene sequence. (D) Alignment of the mutated *gyr*B gene sequence at codon 368. (E) Alignment of the mutated *gyr*B gene sequence at codon 215. The mutation sites are shown by red boxes.
